# Supplementary material for: Novel mutations in B3GALNT2 gene causing α-dystroglycanopathy in Chinese patients
Source: PubMed Central journal article supplement — Chin Med J (Engl). 2020 Dec 7;134(12):1483–5. doi: 10.1097/CM9.0000000000001283 (PMC8213326; doi:10.1097/cm9.0000000000001283), 2020-12-07

**Supplementary Figure 1.** Sanger sequencing confirmed two compound heterozygous mutations

of *B3GALNT2* gene: (A) c.1421\_c.1423delCTC (p.P474del) and c.979G>A (p.D327N) in patients 1;

(B) c.48dupG (p.L17fs) and c.1183G>A (p.G395R) in patient 2. All the parents were carriers.

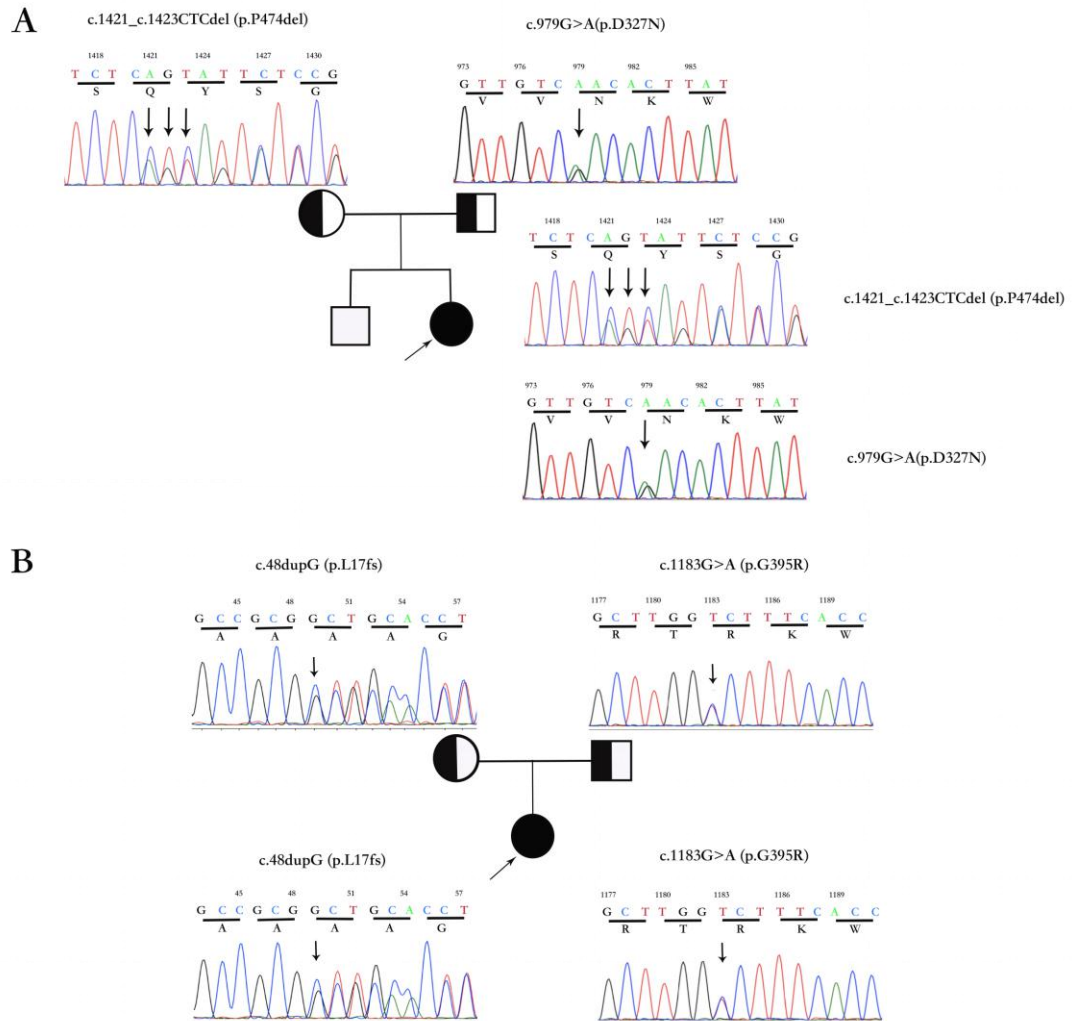

Supplement: cm9-134-1483-s001.pdf [file cm9-134-1483-s001.pdf]
